# Supplementary material
Source: HighWire-hosted journal article supplement (https://openres.ersjournals.com/highwire/filestream/11242/field_highwire_adjunct_files/4/ERJOR-00096-2015_TableS1_patients_characteristics.xls)
Supplement: ERJOR-00096-2015_TableS1_patients_characteristics.xls [file ERJOR-00096-2015_TableS1_patients_characteristics.xls]

## Sheet: Tabelle1
Table S1. Clinical characteristics of patient cohort
Patient	PIAM2	PIAM5	PIAM10	PIAM11	PIAM12	PIAW10	PIAW11	PIBM5	PIBM10	PIBM11	PIBM12	PIBW11	PICM2	PICM6	PICM10	PICW4	PICW7	PICW10	PICW11	PSAM10	PSAW1	PSAW2	PSAW10	PSBM3	PSBM10	PSBW1	PSBW12	PSCM2	PSCW5	PSCW13
sex	male	male	male	male	male	female	female	male	male	male	male	female	male	male	male	female	female	female	female	male	female	female	female	male	male	female	female	male	female	female
age at CF diagnosis [years]	birth	birth	0.7	0.4	0.5	1.7	5.1	birth	6.4	3.4	birth	0.2	19.2	birth	0.3	birth	0.2	1.3	birth	0.7	11.5	3.1	11.4	7.5	0.5	0.9	20.8	0.4	5.1	12.8
Best data during 1-year study period
Body mass index [kg/qm]	18.7	20.2	16.7	15.8	22	21.7	19.4	19.1	20.5	20.2	24	21.4	21.3	19.3	18.9	20.2	27.3	20.3	22.6	16.4	17.2	19.5	17.4	21	22.4	21	19.2	22.7	20.8	16
FVC [% pred.]	113	80	74	75	68	81	79	45	103	42	106	126	69	34	43	58	85	58	89	52	95	88	63	104	102	108	79	123	49	38
FEV1 [% pred.]	109	62	58	63	54	69	75	31	89	28	97	118	52	18	21	32	67	32	72	35	84	74	52	92	98	98	60	91	36	31
Treatment
continuous oral antimicrobials	yes	yes	yes	yes	yes	yes	no	yes	no	yes	no	no	yes	yes	yes	yes	yes	yes	yes	yes	yes	yes	yes	yes	no	no	no	no	yes	yes
aerosolized antibiotics	no	yes	yes	no	no	yes	no	yes	no	yes	no	no	no	yes	yes	yes	no	yes	yes	no	yes	no	no	no	no	no	no	no	yes	yes
regular elective iv chemotherapy	no	yes	no	yes	no	yes	no	yes	no	yes	no	no	no	yes	no	no	no	yes	no	yes	no	no	no	no	no	no	no	no	no	yes
Collection of induced sputum
during acute respiratory tract infection	PIAM2.2											PIBW11.1;2
during pulmonary exacerbation		PIAM5.2
